# Supplementary material for: Change of Workplace Violence Against Female Healthcare Workers in Central China: A Four-wave Cross-sectional Study
Source: Research Square preprint supplement (doi:10.21203/rs.3.rs-6783232/v1), 2025-07-14
Supplement: Supplementary file 1 [file 3ed30dace67ff250df353139.docx]

S3. Frequency distributions and univariate analysis of psychological violence from 2018 to 2022

| Characteristics | | 2018 | | | | 2019 | | | | 2021 | | | | 2022 | | | |
| --- | --- | --- | --- | --- | --- | --- | --- | --- | --- | --- | --- | --- | --- | --- | --- | --- | --- |
|  | n (%) | P-value |  |  | n (%) | P-value |  |  | n (%) | P-value |  |  | n (%) | P-value |  | |
| Age (y) | |  |  | 0.972 |  |  |  | 0.786 |  |  |  | 0.186 |  |  |  | 0.000 |  | |
|  | <31 |  | 218 (47.29) |  |  |  | 181 (40.67) |  |  |  | 89 (29.37) |  |  |  | 65 (16.75) |  |  | |
|  | 31～ |  | 117 (46.43) |  |  |  | 124 (41.06) |  |  |  | 102 (28.81) |  |  |  | 137 (25.00) |  |  | |
|  | 41～ |  | 38 (47.50) |  |  |  | 44 (44.44) |  |  |  | 35 (38.46) |  |  |  | 45 (31.47) |  |  | |
| Ethnic groups | |  |  | 0.373 |  |  |  | 0.132 |  |  |  | 0.983 |  |  |  | 0.953 |  | |
|  | Han |  | 363 (47.33) |  |  |  | 336 (40.83) |  |  |  | 220 (30.22) |  |  |  | 240 (22.88) |  |  | |
|  | Others |  | 10 (38.46) |  |  |  | 13 (56.52) |  |  |  | 6 (30.00) |  |  |  | 7 (23.33) |  |  | |
| Marital status | |  |  | 0.721 |  |  |  | 0.783 |  |  |  | 0.965 |  |  |  | 0.417 |  | |
|  | Single |  | 135 (45.30) |  |  |  | 119 (40.20) |  |  |  | 56 (29.47) |  |  |  | 57 (20.07) |  |  | |
|  | Married |  | 235 (48.16) |  |  |  | 225 (41.67) |  |  |  | 165 (30.44) |  |  |  | 186 (23.88) |  |  | |
|  | Others |  | 3 (42.86) |  |  |  | 5 (50.00) |  |  |  | 5 (31.25) |  |  |  | 4 (25.00) |  |  | |
| Educational level | |  |  | 0.893 |  |  |  | 0.853 |  |  |  | 0.017 |  |  |  | 0.009 |  | |
|  | Junior college or/and below |  | 103 (47.03) |  |  |  | 86 (40.57) |  |  |  | 31 (24.41) |  |  |  | 23 (14.38) |  |  | |
|  | Bachelor degree |  | 228 (46.63) |  |  |  | 226 (41.09) |  |  |  | 155 (29.52) |  |  |  | 186 (23.63) |  |  | |
|  | Master degree or/and above |  | 42 (49.41) |  |  |  | 37 (44.05) |  |  |  | 40 (41.67) |  |  |  | 38 (28.79) |  |  | |
| Work tenure (y) | |  |  | 0.913 |  |  |  | 0.939 |  |  |  | 0.573 |  |  |  | 0.038 |  | |
|  | ~5 |  | 155 (45.72) |  |  |  | 131 (39.70) |  |  |  | 62 (30.85) |  |  |  | 42 (17.00) |  |  | |
|  | 6～ |  | 109 (48.88) |  |  |  | 101 (41.39) |  |  |  | 61 (27.73) |  |  |  | 75 (22.80) |  |  | |
|  | 11～ |  | 42 (45.16) |  |  |  | 57 (43.51) |  |  |  | 52 (28.42) |  |  |  | 71 (26.10) |  |  | |
|  | 16～ |  | 25 (46.30) |  |  |  | 20 (40.82) |  |  |  | 19 (33.93) |  |  |  | 20 (20.20) |  |  | |
|  | 21~ |  | 42 (50.00) |  |  |  | 40 (43.48) |  |  |  | 32 (36.36) |  |  |  | 39 (29.55) |  |  | |
| Occupation | |  |  | **0.001** |  |  |  | 0.013 |  |  |  | 0.132 |  |  |  | 0.017 |  | |
|  | Doctor |  | 75 (50.00) |  |  |  | 67 (41.10) |  |  |  | 60 (35.93) |  |  |  | 68 (29.69) |  |  | |
|  | Nurse |  | 264 (49.62) |  |  |  | 258 (43.43) |  |  |  | 159 (28.96) |  |  |  | 154 (21.54) |  |  | |
|  | Technical support and  administration |  | 34 (30.63) |  |  |  | 24 (26.97) |  |  |  | 7 (21.88) |  |  |  | 25 (18.52) |  |  | |
| Professional title | |  |  | 0.421 |  |  |  | 0.459 |  |  |  | 0.002 |  |  |  | 0.001 |  | |
|  | Senior |  | 17 (51.52) |  |  |  | 18 (46.15) |  |  |  | 31 (50.00) |  |  |  | 32 (38.10) |  |  | |
|  | Middle |  | 90 (51.72) |  |  |  | 82 (39.61) |  |  |  | 68 (29.06) |  |  |  | 97 (24.81) |  |  | |
|  | Junior |  | 257 (45.65) |  |  |  | 242 (42.09) |  |  |  | 126 (28.64) |  |  |  | 114 (19.90) |  |  | |
|  | No title |  | 9 (39.13) |  |  |  | 7 (28.00) |  |  |  | 1 (8.33) |  |  |  | 4 (12.90) |  |  | |
| Position | |  |  | 0.248 |  |  |  | 0.147 |  |  |  | 0.106 |  |  |  | 0.079 |  | |
|  | Manager |  | 26 (54.17) |  |  |  | 17 (36.96) |  |  |  | 15 (40.54) |  |  |  | 19 (35.19) |  |  | |
|  | Department Staff |  | 347 (46.70) |  |  |  | 331 (41.85) |  |  |  | 211 (29.93) |  |  |  | 227 (22.21) |  |  | |
|  | Intern/Trainee |  | 0 (0.00) |  |  |  | 1 (11.11) |  |  |  | 0 (0.00) |  |  |  | 1 (33.33) |  |  | |
| Department | |  |  | **0.000** |  |  |  | 0.000 |  |  |  | 0.000 |  |  |  | 0.095 |  | |
|  | Internal medicine |  | 138 (48.59) |  |  |  | 145 (42.65) |  |  |  | 87 (30.00) |  |  |  | 92 (26.44) |  |  | |
|  | Surgery |  | 124 (48.63) |  |  |  | 96 (44.24) |  |  |  | 66 (27.97) |  |  |  | 57 (20.80) |  |  | |
|  | Outpatient and emergency |  | 56 (64.37) |  |  |  | 60 (57.69) |  |  |  | 53 (49.07) |  |  |  | 54 (25.84) |  |  | |
|  | Technical support |  | 12 (48.00) |  |  |  | 7 (29.17) |  |  |  | 5 (50.00) |  |  |  | 9 (17.65) |  |  | |
|  | Administration department |  | 43 (30.28) |  |  |  | 41 (25.47) |  |  |  | 15 (14.42) |  |  |  | 35 (17.77) |  |  | |
| Salary (yuan/M) | | |  | 0.227 |  |  |  | 0.277 |  |  |  | 0.097 |  |  |  | 0.005 |  | |
|  | <4000 |  | 305 (47.29) |  |  |  | 240 (42.63) |  |  |  | 84 (26.92) |  |  |  | 77 (18.03) |  |  | |
|  | 4000～ |  | 58 (43.61) |  |  |  | 104 (39.39) |  |  |  | 108 (31.03) |  |  |  | 124 (25.05) |  |  | |
|  | 6000～ |  | 10 (66.67) |  |  |  | 5 (26.32) |  |  |  | 34 (38.64) |  |  |  | 46 (29.30) |  |  | |
| Contract status | |  |  | 0.374 |  |  |  | 0.222 |  |  |  | 0.305 |  |  |  | 0.003 |  | |
|  | Permanent |  | 311 (47.77) |  |  |  | 313 (42.01) |  |  |  | 203 (30.85) |  |  |  | 233 (24.22) |  |  | |
|  | Temporary |  | 62 (43.66) |  |  |  | 36 (35.64) |  |  |  | 23 (25.56) |  |  |  | 14 (11.97) |  |  | |
| Shift work | |  |  | 0.275 |  |  |  | 0.010 |  |  |  | 0.274 |  |  |  | 0.851 |  | |
|  | Yes |  | 313 (47.93) |  |  |  | 297 (43.36) |  |  |  | 203 (30.90) |  |  |  | 202 (23.01) |  |  | |
|  | No |  | 60 (42.86) |  |  |  | 52 (32.30) |  |  |  | 23 (25.28) |  |  |  | 45 (22.39) |  |  | |
| Night work | |  |  | 0.083 |  |  |  | 0.080 |  |  |  | 0.105 |  |  |  | 0.079 |  | |
|  | Yes |  | 220 (49.77) |  |  |  | 208 (43.88) |  |  |  | 163 (32.09) |  |  |  | 180 (24.42) |  |  | |
|  | No |  | 153 (43.59) |  |  |  | 141 (37.90) |  |  |  | 63 (26.25) |  |  |  | 67 (19.59) |  |  | |
| Have contacts with patients | |  |  | 0.001 |  |  |  | 0.000 |  |  |  | 0.001 |  |  |  | 0.000 |  | |
|  | Yes |  | 353 (48.89) |  |  |  | 333 (43.82) |  |  |  | 222 (31.67) |  |  |  | 238 (25.79) |  |  | |
|  | No |  | 20 (28.17) |  |  |  | 16 (18.60) |  |  |  | 4 (8.51) |  |  |  | 9 (5.77) |  |  | |
| Have direct physical contacts/  interactions with patients | |  |  | 0.000 |  |  |  | 0.000 |  |  |  | 0.226 |  |  |  | 0.001 |  | |
|  | Yes |  | 278 (52.16) |  |  |  | 261 (46.44) |  |  |  | 160 (31.62) |  |  |  | 157 (26.98) |  |  | |
|  | No |  | 95 (36.54) |  |  |  | 88 (30.99) |  |  |  | 66 (27.27) |  |  |  | 90 (18.11) |  |  | |
| Numbers of co-workers | |  |  | 0.874 |  |  |  | 0.048 |  |  |  | 0.148 |  |  |  | 0.412 |  | |
|  | Work alone |  | 2 (50.00) |  |  |  | 3 (60.00) |  |  |  | 6 (54.55) |  |  |  | 6 (28.57) |  |  | |
|  | 1～5 |  | 43 (43.88) |  |  |  | 45 (38.46) |  |  |  | 48 (32.88) |  |  |  | 59 (23.60) |  |  | |
|  | 6～10 |  | 53 (44.17) |  |  |  | 35 (32.41) |  |  |  | 31 (27.93) |  |  |  | 47 (18.58) |  |  | |
|  | 11～15 |  | 67 (46.85) |  |  |  | 79 (50.00) |  |  |  | 28 (23.33) |  |  |  | 57 (23.46) |  |  | |
|  | 16～ |  | 208 (48.60) |  |  |  | 187 (40.83) |  |  |  | 113 (31.39) |  |  |  | 78 (25.00) |  |  | |
| Worry about WPV | |  |  | 0.000 |  |  |  | 0.000 |  |  |  | 0.000 |  |  |  | 0.000 |  | |
|  | Zero |  | 12 (16.44) |  |  |  | 8 (11.76) |  |  |  | 8 (9.76) |  |  |  | 9 (4.21) |  |  | |
|  | Low |  | 114 (43.18) |  |  |  | 99 (36.80) |  |  |  | 68 (25.95) |  |  |  | 84 (25.85) |  |  | |
|  | Moderate |  | 52 (55.91) |  |  |  | 70 (61.95) |  |  |  | 52 (55.32) |  |  |  | 35 (39.33) |  |  | |
|  | High |  | 149 (63.14) |  |  |  | 140 (57.14) |  |  |  | 72 (48.00) |  |  |  | 70 (46.67) |  |  | |
|  | Extremely high |  | 46 (36.22) |  |  |  | 32 (21.19) |  |  |  | 26 (16.25) |  |  |  | 49 (16.28) |  |  | |
| Aware of the procedures for reporting WPV | |  |  | 0.014 |  |  |  | 0.000 |  |  |  | 0.000 |  |  |  | 0.001 |  | |
|  | Yes |  | 196 (43.27) |  |  |  | 196 (36.70) |  |  |  | 107 (24.21) |  |  |  | 141 (19.78) |  |  | |
|  | No |  | 177 (52.06) |  |  |  | 153 (49.04) |  |  |  | 119 (38.89) |  |  |  | 106 (28.96) |  |  | |
| Familiar of the procedures for reporting WPV | |  |  | 0.053 |  |  |  | 0.001 |  |  |  | 0.000 |  |  |  | 0.000 |  | |
|  | Yes |  | 160 (43.36) |  |  |  | 150 (35.55) |  |  |  | 81 (22.31) |  |  |  | 97 (16.99) |  |  | |
|  | No |  | 213 (50.24) |  |  |  | 199 (46.93) |  |  |  | 145 (37.66) |  |  |  | 150 (29.53) |  |  | |
| Encouraged to report WPV | |  |  | 0.201 |  |  |  | 0.000 |  |  |  | 0.002 |  |  |  | 0.005 |  | |
|  | Yes |  | 190 (44.92) |  |  |  | 166 (35.24) |  |  |  | 103 (25.43) |  |  |  | 128 (19.94) |  |  | |
|  | No |  | 183 (49.46) |  |  |  | 183 (48.80) |  |  |  | 123 (35.86) |  |  |  | 119 (27.23) |  |  | |
