# Supplementary material for: Change of Workplace Violence Against Female Healthcare Workers in Central China: A Four-wave Cross-sectional Study
Source: Research Square preprint supplement (doi:10.21203/rs.3.rs-6783232/v1), 2025-07-14
Supplement: Supplementary file 2 [file 98921ef99fb8defb2ccf6086.docx]

S2. Frequency distributions and univariate analysis of physical violence from 2018 to 2022

| Characteristics | | 2018 | | | | 2019 | | | | 2021 | | | | 2022 | | | |
| --- | --- | --- | --- | --- | --- | --- | --- | --- | --- | --- | --- | --- | --- | --- | --- | --- | --- |
|  | n (%) | P-value |  |  | n (%) | P-value |  |  | n (%) | P-value |  |  | n (%) | P-value |  |
| Age (y) | |  |  | 0.469 |  |  |  | 0.236 |  |  |  | 0.297 |  |  |  | 0.026 |  |
|  | <31 |  | 35 (7.59) |  |  |  | 21 (4.72) |  |  |  | 8 (2.64) |  |  |  | 3 (0.77) |  |  |
|  | 31～ |  | 23 (9.13) |  |  |  | 12 (3.97) |  |  |  | 4 (1.13) |  |  |  | 5 (0.91) |  |  |
|  | 41～ |  | 4 (5.00) |  |  |  | 1 (1.01) |  |  |  | 1 (1.10) |  |  |  | 5 (3.50) |  |  |
| Ethnic groups | |  |  | 0.472 |  |  |  | 0.320 |  |  |  | 0.547 |  |  |  | 0.540 |  |
|  | Han |  | 59 (7.69) |  |  |  | 34 (4.13) |  |  |  | 13 (1.79) |  |  |  | 13 (1.24) |  |  |
|  | Others |  | 3 (11.54) |  |  |  | 0 (0.00) |  |  |  | 0 (0.00) |  |  |  | 0 (0.00) |  |  |
| Marital status | |  |  | 0.469 |  |  |  | 0.621 |  |  |  | 0.798 |  |  |  | 0.066 |  |
|  | Single |  | 27 (9.06) |  |  |  | 12 (4.05) |  |  |  | 4 (2.11) |  |  |  | 1 (0.35) |  |  |
|  | Married |  | 35 (7.17) |  |  |  | 21 (3.89) |  |  |  | 9 (1.66) |  |  |  | 11 (1.41) |  |  |
|  | Others |  | 0 (0.00) |  |  |  | 1 (10.00) |  |  |  | 0 (0.00) |  |  |  | 1 (6.25) |  |  |
| Educational level | |  |  | 0.825 |  |  |  | 0.832 |  |  |  | 0.416 |  |  |  | 0.112 |  |
|  | Junior college or/and below |  | 19 (8.68) |  |  |  | 10 (4.72) |  |  |  | 1 (0.79) |  |  |  | 1 (0.63) |  |  |
|  | Bachelor degree |  | 36 (7.36) |  |  |  | 21 (3.82) |  |  |  | 9 (1.71) |  |  |  | 8 (1.02) |  |  |
|  | Master degree or/and above |  | 7 (8.24) |  |  |  | 3 (3.57) |  |  |  | 3 (3.13) |  |  |  | 4 (3.03) |  |  |
| Work tenure (y) | |  |  | 0.858 |  |  |  | 0.534 |  |  |  | 0.393 |  |  |  | 0.193 |  |
|  | ~5 |  | 26 (7.67) |  |  |  | 13 (3.94) |  |  |  | 3 (1.49) |  |  |  | 1 (0.41) |  |  |
|  | 6～ |  | 17 (7.62) |  |  |  | 12 (4.92) |  |  |  | 6 (2.73) |  |  |  | 4 (1.22) |  |  |
|  | 11～ |  | 8 (8.60) |  |  |  | 5 (3.82) |  |  |  | 4 (2.19) |  |  |  | 2 (0.74) |  |  |
|  | 16～ |  | 6 (11.11) |  |  |  | 3 (6.12) |  |  |  | 0 (0.00) |  |  |  | 2 (2.02) |  |  |
|  | 21~ |  | 5 (5.95) |  |  |  | 1 (1.09) |  |  |  | 0 (0.00) |  |  |  | 4 (3.03) |  |  |
| Occupation | |  |  | **0.025** |  |  |  | 0.713 |  |  |  | 0.131 |  |  |  | 0.619 |  |
|  | Doctor |  | 16 (10.67) |  |  |  | 5 (3.07) |  |  |  | 3 (1.80) |  |  |  | 4 (1.75) |  |  |
|  | Nurse |  | 44 (8.27) |  |  |  | 26 (4.38) |  |  |  | 8 (1.46) |  |  |  | 7 (0.98) |  |  |
|  | Technical support and  administration |  | 2 (1.80) |  |  |  | 3 (3.37) |  |  |  | 2 (6.25) |  |  |  | 2 (1.48) |  |  |
| Professional title | |  |  | 0.292 |  |  |  | 0.357 |  |  |  | 0.507 |  |  |  | 0.294 |  |
|  | Senior |  | 2 (6.06) |  |  |  | 2 (5.13) |  |  |  | 2 (3.23) |  |  |  | 2 (2.38) |  |  |
|  | Middle |  | 18 (10.34) |  |  |  | 5 (2.42) |  |  |  | 2 (0.86) |  |  |  | 7 (1.79) |  |  |
|  | Junior |  | 42 (7.46) |  |  |  | 27 (4.70) |  |  |  | 9 (2.05) |  |  |  | 4 (0.70) |  |  |
|  | No title |  | 0 (0.00) |  |  |  | 0 (0.00) |  |  |  | 0 (0.00) |  |  |  | 0 (0.00) |  |  |
| Position | |  |  | 0.840 |  |  |  | 0.822 |  |  |  | 0.668 |  |  |  | 0.889 |  |
|  | Manager |  | 3 (6.25) |  |  |  | 2 (4.35) |  |  |  | 0 (0.00) |  |  |  | 1 (1.85) |  |  |
|  | Department Staff |  | 59 (7.94) |  |  |  | 32 (4.05) |  |  |  | 13 (1.84) |  |  |  | 12 (1.17) |  |  |
|  | Intern/Trainee |  | 0 (0.00) |  |  |  | 0 (0.00) |  |  |  | 0 (0.00) |  |  |  | 0 (0.00) |  |  |
| Department | |  |  | **0.000** |  |  |  | 0.000 |  |  |  | 0.107 |  |  |  | 0.485 |  |
|  | Internal medicine |  | 24 (8.45) |  |  |  | 15 (4.41) |  |  |  | 5 (1.72) |  |  |  | 5 (1.44) |  |  |
|  | Surgery |  | 13 (5.10) |  |  |  | 5 (2.30) |  |  |  | 3 (1.27) |  |  |  | 1 (0.37) |  |  |
|  | Outpatient and emergency |  | 19 (21.84) |  |  |  | 12 (11.54) |  |  |  | 5 (4.63) |  |  |  | 4 (1.91) |  |  |
|  | Technical support |  | 2 (8.00) |  |  |  | 0 (0.00) |  |  |  | 0 (0.00) |  |  |  | 0 (0.00) |  |  |
|  | Administration department |  | 4 (2.82) |  |  |  | 2 (1.24) |  |  |  | 0 (0.00) |  |  |  | 3 (1.52) |  |  |
| Salary (yuan/M) | | |  | 0.680 |  |  |  | 0.370 |  |  |  | 0.712 |  |  |  | 0.191 |  |
|  | <4000 |  | 53 (8.22) |  |  |  | 26 (4.62) |  |  |  | 4 (1.28) |  |  |  | 2 (0.47) |  |  |
|  | 4000～ |  | 8 (6.02) |  |  |  | 8 (3.03) |  |  |  | 7 (2.01) |  |  |  | 8 (1.62) |  |  |
|  | 6000～ |  | 1 (6.67) |  |  |  | 0 (0.00) |  |  |  | 2 (2.27) |  |  |  | 3 (1.91) |  |  |
| Contract status | |  |  | 0.704 |  |  |  | 0.099 |  |  |  | 0.708 |  |  |  | 0.206 |  |
|  | Permanent |  | 52 (7.99) |  |  |  | 33 (4.43) |  |  |  | 11 (1.67) |  |  |  | 13 (1.35) |  |  |
|  | Temporary |  | 10 (7.04) |  |  |  | 1 (0.99) |  |  |  | 2 (2.22) |  |  |  | 0 (0.00) |  |  |
| Shift work | |  |  | 0.086 |  |  |  | 0.122 |  |  |  | 0.176 |  |  |  | 0.762 |  |
|  | Yes |  | 56 (8.58) |  |  |  | 31 (4.53) |  |  |  | 13 (1.98) |  |  |  | 11 (1.25) |  |  |
|  | No |  | 6 (4.29) |  |  |  | 3 (1.86) |  |  |  | 0 (0.00) |  |  |  | 2 (1.00) |  |  |
| Night work | |  |  | 0.147 |  |  |  | 0.036 |  |  |  | 0.057 |  |  |  | 0.203 |  |
|  | Yes |  | 40 (9.05) |  |  |  | 25 (5.27) |  |  |  | 12 (2.36) |  |  |  | 11 (1.49) |  |  |
|  | No |  | 22 (6.27) |  |  |  | 9 (2.42) |  |  |  | 1 (0.42) |  |  |  | 2 (0.59) |  |  |
| Have contacts with patients | |  |  | 0.237 |  |  |  | 0.045 |  |  |  | 0.346 |  |  |  | 0.136 |  |
|  | Yes |  | 59 (8.17) |  |  |  | 34 (4.47) |  |  |  | 13 (1.85) |  |  |  | 13 (1.41) |  |  |
|  | No |  | 3 (4.23) |  |  |  | 0 (0.00) |  |  |  | 0 (0.00) |  |  |  | 0 (0.00) |  |  |
| Have direct physical contacts/  interactions with patients | |  |  | 0.075 |  |  |  | 0.002 |  |  |  | 0.187 |  |  |  | 0.260 |  |
|  | Yes |  | 48 (9.01) |  |  |  | 31 (5.52) |  |  |  | 11 (2.17) |  |  |  | 5 (0.86) |  |  |
|  | No |  | 14 (5.38) |  |  |  | 3 (1.06) |  |  |  | 2 (0.83) |  |  |  | 8 (1.61) |  |  |
| Numbers of co-workers | |  |  | 0.705 |  |  |  | 0.155 |  |  |  | 0.575 |  |  |  | 0.465 |  |
|  | Work alone |  | 1 (25.00) |  |  |  | 1 (20.00) |  |  |  | 0 (0.00) |  |  |  | 0 (0.00) |  |  |
|  | 1～5 |  | 8 (8.16) |  |  |  | 4 (3.42) |  |  |  | 3 (2.06) |  |  |  | 4 (1.60) |  |  |
|  | 6～10 |  | 10 (8.33) |  |  |  | 7 (6.48) |  |  |  | 2 (1.80) |  |  |  | 2 (0.79) |  |  |
|  | 11～15 |  | 9 (6.29) |  |  |  | 8 (5.06) |  |  |  | 0 (0.00) |  |  |  | 1 (0.41) |  |  |
|  | 16～ |  | 34 (7.94) |  |  |  | 14 (3.06) |  |  |  | 8 (2.22) |  |  |  | 6 (1.92) |  |  |
| Worry about WPV | |  |  | **0.000** |  |  |  | 0.000 |  |  |  | 0.002 |  |  |  | 0.000 |  |
|  | Zero |  | 0 (0.00) |  |  |  | 0 (0.00) |  |  |  | 0 (0.00) |  |  |  | 0 (0.00) |  |  |
|  | Low |  | 14 (5.30) |  |  |  | 6 (2.23) |  |  |  | 2 (0.76) |  |  |  | 2 (0.62) |  |  |
|  | Moderate |  | 11 (11.83) |  |  |  | 6 (5.31) |  |  |  | 4 (4.26) |  |  |  | 3 (3.37) |  |  |
|  | High |  | 34 (14.41) |  |  |  | 21 (8.57) |  |  |  | 7 (4.67) |  |  |  | 7 (4.67) |  |  |
|  | Extremely high |  | 3 (2.36) |  |  |  | 1 (0.66) |  |  |  | 0 (0.00) |  |  |  | 1 (0.33) |  |  |
| Aware of the procedures for reporting WPV | |  |  | 0.876 |  |  |  | 0.106 |  |  |  | 0.339 |  |  |  | 0.034 |  |
|  | Yes |  | 36 (7.95) |  |  |  | 17 (3.18) |  |  |  | 6 (1.36) |  |  |  | 5 (0.70) |  |  |
|  | No |  | 26 (7.65) |  |  |  | 17 (5.45) |  |  |  | 7 (2.29) |  |  |  | 8 (2.19) |  |  |
| Familiar of the procedures for reporting WPV | |  |  | 0.968 |  |  |  | 0.082 |  |  |  | 0.196 |  |  |  | 0.107 |  |
|  | Yes |  | 29 (7.86) |  |  |  | 12 (2.84) |  |  |  | 4 (1.10) |  |  |  | 4 (0.70) |  |  |
|  | No |  | 33 (7.78) |  |  |  | 22 (5.19) |  |  |  | 9 (2.34) |  |  |  | 9 (1.77) |  |  |
| Encouraged to report WPV | |  |  | 0.583 |  |  |  | 0.037 |  |  |  | 0.252 |  |  |  | 0.034 |  |
|  | Yes |  | 31 (7.33) |  |  |  | 13 (2.76) |  |  |  | 5 (1.24) |  |  |  | 4 (0.62) |  |  |
|  | No |  | 31 (8.38) |  |  |  | 21 (5.60) |  |  |  | 8 (2.33) |  |  |  | 9 (2.06) |  |  |
