# Supplementary material for: Change of Workplace Violence Against Female Healthcare Workers in Central China: A Four-wave Cross-sectional Study
Source: Research Square preprint supplement (doi:10.21203/rs.3.rs-6783232/v1), 2025-07-14
Supplement: Supplementary file 3 [file 9af26b3cff5cb455303ee625.docx]

S1. Socio-demographic characteristics of the female healthcare workers from 2018 to 2022

| Characteristics | | | 2018 | 2019 | 2021 | 2022 | Total |
| --- | --- | --- | --- | --- | --- | --- | --- |
| n (%) | n (%) | n (%) | n (%) | n (%) |
| Age (y) | | |  |  |  |  |  |
|  | <31 | | 461 (58.13) | 445 (52.60) | 303 (40.51) | 388 (35.96) | 1597 (46.08) |
|  | 31～ | | 252 (31.78) | 302 (35.70) | 354 (47.33) | 548 (50.79) | 1456 (42.01) |
|  | 41～ | | 80 (10.09) | 99 (11.70) | 91 (12.17) | 143 (13.25) | 413 (11.92) |
| Ethnic groups | | |  |  |  |  |  |
|  | Han | | 767 (96.72) | 823 (97.28) | 728 (97.33) | 1049 (97.22) | 3367 (97.14) |
|  | Others | | 26 (3.28) | 23 (2.72) | 20 (2.67) | 30 (2.78) | 99 (2.86) |
| Marital status | | |  |  |  |  |  |
|  | Single | | 298 (37.58) | 296 (34.99) | 190 (25.40) | 284 (26.32) | 1068 (30.81) |
|  | Married | | 488 (61.54) | 540 (63.83) | 542 (72.46) | 779 (72.20) | 2349 (67.77) |
|  | Others | | 7 (0.88) | 10 (1.18) | 16 (2.14) | 16 (1.48) | 49 (1.41) |
| Educational level | | |  |  |  |  |  |
|  | Junior college or/and below | | 219 (27.62) | 212 (25.06) | 127 (16.98) | 160 (14.83) | 718 (20.72) |
|  | Bachelor degree | | 489 (61.66) | 550 (65.01) | 525 (70.19) | 787 (72.94) | 2351 (67.83) |
|  | Master degree or/and above | | 85 (10.72) | 84 (9.93) | 96 (12.83) | 132 (12.23) | 397 (11.45) |
| Work tenure (y) | | |  |  |  |  |  |
|  | ~5 | | 339 (42.75) | 330 (39.01) | 201 (26.87) | 247 (22.89) | 1117 (32.22) |
|  | 6～ | | 223 (28.12) | 244 (28.84) | 220 (29.41) | 329 (30.49) | 1016 (29.31) |
|  | 11～ | | 93 (11.73) | 131 (15.48) | 183 (24.47) | 272 (25.21) | 679 (19.59) |
|  | 16～ | | 54 (6.81) | 49 (5.79) | 56 (7.49) | 99 (9.18) | 258 (7.44) |
|  | 21~ | | 84 (10.59) | 92 (10.87) | 88 (11.76) | 132 (12.23) | 396 (11.43) |
| Occupation | | |  |  |  |  |  |
|  | Doctor | | 150 (18.92) | 163 (19.27) | 167 (22.33) | 229 (21.22) | 709 (20.46) |
|  | Nurse | | 532 (67.09) | 594 (70.21) | 549 (73.40) | 715 (66.27) | 2390 (68.96) |
|  | Technical support and  administration | | 111 (14.00) | 89 (10.52) | 32 (4.28) | 135 (12.51) | 367 (10.59) |
| Professional title | | |  |  |  |  |  |
|  | Senior | | 33 (4.16) | 39 (4.61) | 62 (8.29) | 84 (7.78) | 218 (6.29) |
|  | Middle | | 174 (21.94) | 207 (24.47) | 234 (31.28) | 391 (36.24) | 1006 (29.02) |
|  | Junior | | 563 (71.00) | 575 (67.97) | 440 (58.82) | 573 (53.10) | 2151 (62.06) |
|  | No title | | 23 (2.90) | 25 (2.96) | 12 (1.60) | 31 (2.87) | 91 (2.63) |
| Position | | |  |  |  |  |  |
|  | Manager | | 48 (6.05) | 46 (5.44) | 37 (4.95) | 54 (5.00) | 185 (5.34) |
|  | Department Staff | | 743 (93.69) | 791 (93.50) | 705 (94.25) | 1022 (94.72) | 3261 (94.09) |
|  | Intern/Trainee | | 2 (0.25) | 9 (1.06) | 6 (0.80) | 3 (0.28) | 20 (0.58) |
| Department | | |  |  |  |  |  |
|  | Internal medicine | | 284 (35.81) | 340 (40.19) | 290 (38.77) | 348 (32.25) | 1262 (36.41) |
|  | Surgery | | 255 (32.16) | 217 (25.65) | 236 (31.55) | 274 (25.39) | 982 (28.33) |
|  | Outpatient and emergency | | 87 (10.97) | 104 (12.29) | 108 (14.44) | 209 (19.37) | 508 (14.66) |
|  | Technical support | | 142 (17.91) | 161 (19.03) | 104 (13.90) | 197 (18.26) | 604 (17.43) |
|  | Administration department | | 25 (3.15) | 24 (2.84) | 10 (1.34) | 51 (4.73) | 110 (3.17) |
| Salary (yuan/M) | | | |  |  |  |  |
|  | <4000 | | 645 (81.34) | 563 (66.55) | 312 (41.71) | 427 (39.57) | 1947 (56.17) |
|  | 4000～ | | 133 (16.77) | 264 (31.21) | 348 (46.52) | 495 (45.88) | 1240 (35.78) |
|  | 6000～ | | 15 (1.89) | 19 (2.25) | 88 (11.76) | 157 (14.55) | 279 (8.05) |
| Contract status | | |  |  |  |  |  |
|  | Permanent | | 810 (83.42) | 900 (87.63) | 813 (87.42) | 1180 (87.67) | 3703 (86.64) |
|  | Temporary | | 161 (16.58) | 127 (12.37) | 117 (12.58) | 166 (12.33) | 571 (13.36) |
| Shift work | | |  |  |  |  |  |
|  | Yes | | 653 (82.35) | 685 (80.97) | 657 (87.83) | 878 (81.37) | 2873 (82.89) |
|  | No | | 140 (17.65) | 161 (19.03) | 91 (12.17) | 201 (18.63) | 593 (17.11) |
| Night work | | |  |  |  |  |  |
|  | Yes | | 442 (55.74) | 474 (56.03) | 508 (67.91) | 737 (68.30) | 2161 (62.35) |
|  | No | | 351 (44.26) | 372 (43.97) | 240 (32.09) | 342 (31.70) | 1305 (37.65) |
| Have contacts with patients | | |  |  |  |  |  |
|  | Yes | | 722 (91.05) | 760 (89.83) | 701 (93.72) | 923 (85.54) | 3106 (89.61) |
|  | No | | 71 (8.95) | 86 (10.17) | 47 (6.28) | 156 (14.46) | 360 (10.39) |
| Have direct physical contacts/  interactions with patients | | |  |  |  |  |  |
|  | Yes | | 533 (67.21) | 562 (66.43) | 506 (67.65) | 582 (53.94) | 2183 (62.98) |
|  | No | | 260 (32.79) | 284 (33.57) | 242 (32.35) | 497 (46.06) | 1283 (37.02) |
| Numbers of co-workers | | |  |  |  |  |  |
|  | Work alone | | 4 (0.50) | 5 (0.59) | 11 (1.47) | 21 (1.95) | 41 (1.18) |
|  | 1～5 | | 98 (12.36) | 117 (13.83) | 146 (19.52) | 250 (23.17) | 611 (17.63) |
|  | 6～10 | | 120 (15.13) | 108 (12.77) | 111 (14.84) | 253 (23.45) | 592 (17.08) |
|  | 11～15 | | 143 (18.03) | 158 (18.68) | 120 (16.04) | 243 (22.52) | 664 (19.16) |
|  | 16～ | | 428 (53.97) | 458 (54.14) | 360 (48.13) | 312 (28.92) | 1558 (44.95) |
| Worry about WPV | | |  |  |  |  |  |
|  | | Zero | 73 (9.21) | 68 (8.04) | 82 (10.96) | 214 (19.83) | 437 (12.61) |
|  | | Low | 127 (16.02) | 151 (17.85) | 160 (21.39) | 301 (27.90) | 739 (21.32) |
|  | | Moderate | 264 (33.29) | 269 (31.80) | 262 (35.03) | 325 (30.12) | 1120 (32.31) |
|  | | High | 93 (11.73) | 113 (13.36) | 94 (12.57) | 89 (8.25) | 389 (11.22) |
|  | | Extremely high | 236 (29.76) | 245 (28.96) | 150 (20.05) | 150 (13.90) | 781 (22.53) |
| Aware of the procedures for reporting WPV | | |  |  |  |  |  |
|  | Yes | | 453 (57.12) | 534 (63.12) | 442 (59.09) | 713 (66.08) | 2142 (61.80) |
|  | No | | 340 (42.88) | 312 (36.88) | 306 (40.91) | 366 (33.92) | 1324 (38.20) |
| Familiar of the procedures for reporting WPV | | |  |  |  |  |  |
|  | Yes | | 369 (46.53) | 422 (49.88) | 363 (48.53) | 571 (52.92) | 1725 (49.77) |
|  | No | | 424 (53.47) | 424 (50.12) | 385 (51.47) | 508 (47.08) | 1741 (50.23) |
| Encouraged to report WPV | | |  |  |  |  |  |
|  | Yes | | 423 (53.34) | 471 (55.67) | 405 (54.14) | 642 (59.50) | 1941 (56.00) |
|  | No | | 370 (46.66) | 375 (44.33) | 343 (45.86) | 437 (40.50) | 1525 (44.00) |
